# Supplementary material
Source: publisher figshare collection journal article supplement (https://acs.figshare.com/ndownloader/files/3583290)
Supplement: Supplementary file 1 [file 3583290]

Supplementary Information (SI) to accompany

Two-stage capture employing active transport enables sensitive and fast biosensors

Parag Katira and Henry Hess\*

\*Henry Hess

Columbia University

Department of Biomedical Engineering

351L Engineering Terrace

MC 8904

1210 Amsterdam Avenue

New York, NY 10027

Fax: (212) 854-8725

Tel: (212) 854-7749

E-mail: [hh2374@columbia.edu](mailto:hh2374@columbia.edu)

### Supplementary figures:

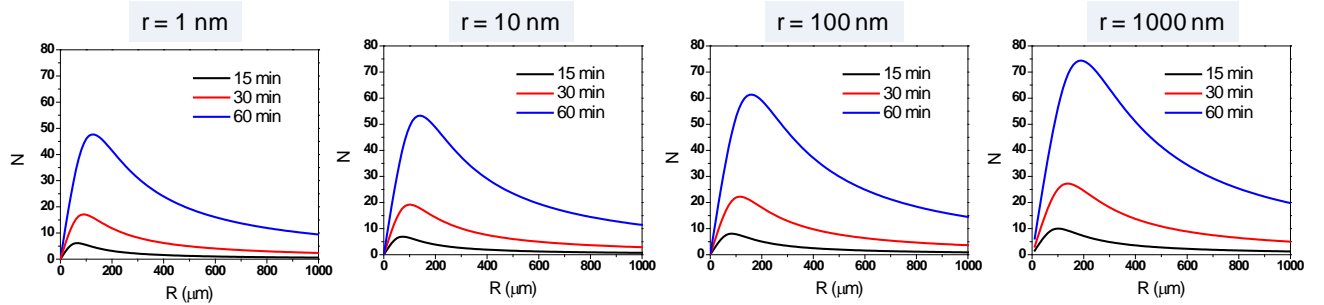

**Supplementary Figure 1.** Number of analytes collected for 3D analyte diffusion onto molecular shuttles followed by undirected (diffusive) shuttle movement as a function of compartment radius  $R$ . The available time for collection (15, 30, 60 min shown) and the radius  $r$  of the sensor patch determine the optimal size of the sensor compartment. A diffusion constant for 3D-diffusion of  $80 \mu\text{m}^2/\text{s}$ , active transport velocity  $v$  of  $0.5 \mu\text{m}/\text{s}$ , capture fraction  $f$  of 0.9 and analyte concentration  $C$  of 1 fM is assumed.

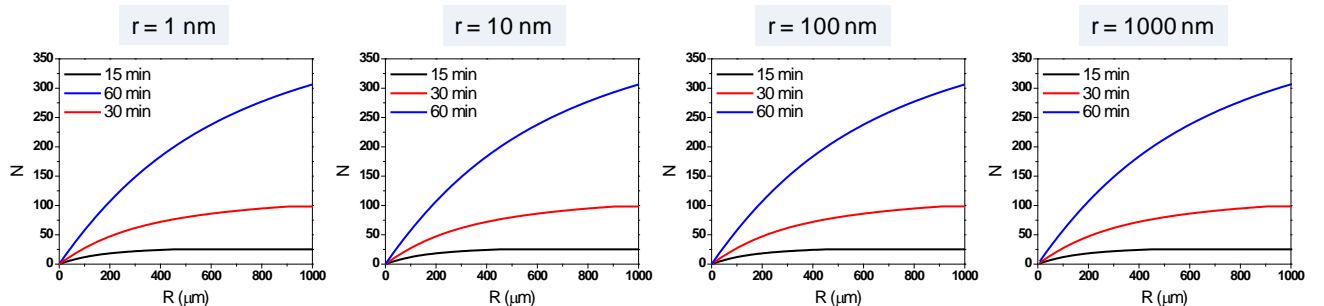

**Supplementary Figure 2.** Number of analytes collected for 3D analyte diffusion onto molecular shuttles followed by directed transport as a function of compartment radius  $R$ . Increasing the

compartment radius  $R$  increases the number of collected analytes  $N$  but once  $\tau_{\text{avg}} = t$  (time for detection), the number of analytes captured in time  $t$  would remain constant. The size of the sensor patch does not visibly affect the number of collected analytes. A diffusion constant for 3D-diffusion of  $80 \mu\text{m}^2/\text{s}$ , an active transport velocity  $v$  of  $0.5 \mu\text{m}/\text{s}$ , a capture fraction  $f$  of  $0.9$  and an analyte concentration  $C$  of  $1 \text{ fM}$  is assumed.

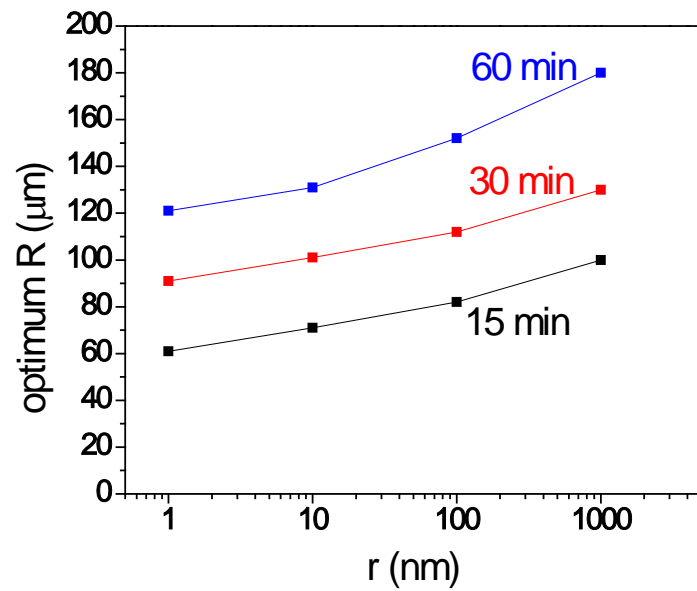

**Supplementary Figure 3.** Optimum compartment size for a two stage capture process involving 3D diffusion to molecular shuttles followed by random 2D motion of the shuttles along the surface to the sensor patch. A diffusion constant of  $80 \mu\text{m}^2/\text{s}$  for 3D-diffusion and an active transport velocity of  $0.5 \mu\text{m}/\text{s}$  is assumed.
